# Supplementary material for: Towards ubiquitous requirements engineering through recommendations based on context histories
Source: PeerJ Comput Sci. 2022 Jan 3;8:e794. doi: 10.7717/peerj-cs.794 (PMC8771779; doi:10.7717/peerj-cs.794)
Supplement: Supplemental Information 3 [file peerj-cs-08-794-s003.xlsx]

## Sheet: Data
	Datetime	Which approach does your team use currently?	What is your experience as a Project Manager or a member of a project team?	How many employees work in the company where you work currently?	Which areas do you consider most critical to the success of the project?	In the projects where problems occurred, what were the areas in which the problems were identified?	What types of suggestions would you like to receive from a proactive project management tool?	Do you believe that information from other projects already completed could assist in project management?
0	2018/07/20 12:31:22 PM GMT-3	The team does not use any specific methodology	More than 5 years	More than 100 employees	Time;Costs;Human Resources	Costs	Risks to the project;Possibility of delay;Possibility of exceeds costs	Yes
1	2018/07/20 3:15:21 PM GMT-3	Traditional (PMBoK, RUP, PRINCE2, etc)	More than 5 years	Less than 20 employees	Time;Costs;Human Resources	Time;Quality	Risks to the project;Resource allocation;Possibility of delay;Possibility of exceeds costs	Yes
2	2018/08/16 7:55:13 PM GMT-3	Agile	More than 5 years	More than 100 employees	Scope;Quality;Risks	Scope;Communications;Stakeholders	Risks to the project;Possibility of delay;Possibility of exceeds costs	Yes
3	2018/08/16 8:36:51 PM GMT-3	Bimodal (hybrid model with characteristics of agile and traditional projects)	More than 5 years	From 20 to 100 employees	Costs;Communications;Risks	Communications	Risks to the project;Suggestions of requirements and new functionalities	Yes
4	2018/08/16 8:39:36 PM GMT-3	Agile	More than 5 years	Less than 20 employees	Scope;Time;Quality	Time;Costs;Quality	Possibility of delay	Yes
5	2018/08/16 8:56:39 PM GMT-3	The team does not use any specific methodology	Less than 2 years	More than 100 employees	Integration;Time;Quality	Time	Risks to the project;Resource allocation;Possibility of delay	Yes
6	2018/08/16 9:09:56 PM GMT-3	Agile	Less than 2 years	From 20 to 100 employees	Integration;Communications;Stakeholders	Integration;Communications;Stakeholders	Possibility of delay;Suggestions of requirements and new functionalities	Yes
7	2018/08/16 9:10:51 PM GMT-3	Bimodal (hybrid model with characteristics of agile and traditional projects)	More than 5 years	More than 100 employees	Integration;Scope;Communications	Scope;Human Resources;Communications	Risks to the project;Resource allocation;Possibility of delay;Possibility of exceeds costs	Yes
8	2018/08/16 9:18:32 PM GMT-3	Traditional (PMBoK, RUP, PRINCE2, etc)	More than 5 years	More than 100 employees	Communications;Risks;Stakeholders	Time;Communications;Risks	Risks to the project;Resource allocation;Possibility of delay;Possibility of exceeds costs;Suggestions of requirements and new functionalities;Priority tasks	Yes
9	2018/08/16 9:30:28 PM GMT-3	Bimodal (hybrid model with characteristics of agile and traditional projects)	More than 5 years	From 20 to 100 employees	Scope;Time	Time;Risks	Risks to the project;Resource allocation;Possibility of delay	Yes
10	2018/08/16 10:18:47 PM GMT-3	Agile	More than 5 years	More than 100 employees	Integration;Human Resources;Communications;Stakeholders	Integration;Time;Communications	Risks to the project;Resource allocation;Possibility of delay;Possibility of exceeds costs	Partially
11	2018/08/17 5:26:58 AM GMT-3	Bimodal (hybrid model with characteristics of agile and traditional projects)	More than 5 years	More than 100 employees	Quality;Human Resources;Communications;Stakeholders	Human Resources;Communications;Stakeholders	Risks to the project;Resource allocation;Possibility of delay;Possibility of exceeds costs;Suggestions of requirements and new functionalities	Yes
12	2018/08/17 8:22:27 AM GMT-3	The team does not use any specific methodology	More than 5 years	More than 100 employees	Integration;Quality;Human Resources;Communications;Stakeholders	Integration;Quality;Communications	Risks to the project;Possibility of delay	Partially
13	2018/08/17 8:47:27 AM GMT-3	Agile	More than 5 years	More than 100 employees	Integration;Communications;Stakeholders	Integration;Scope;Costs	Risks to the project;Resource allocation;Possibility of delay;Possibility of exceeds costs	Yes
14	2018/08/17 10:55:40 AM GMT-3	Bimodal (hybrid model with characteristics of agile and traditional projects)	More than 5 years	More than 100 employees	Scope;Communications	Scope;Communications	Resource allocation;Possibility of delay;Possibility of exceeds costs	Yes
15	2018/08/17 1:39:05 PM GMT-3	Traditional (PMBoK, RUP, PRINCE2, etc)	More than 5 years	More than 100 employees	Communications	Time;Communications;Stakeholders	Risks to the project;Resource allocation;Suggestions of requirements and new functionalities	Yes
16	2018/08/17 2:14:27 PM GMT-3	Agile	Less than 2 years	Less than 20 employees	Communications	Quality	Risks to the project	Yes
17	2018/08/18 5:51:15 AM GMT-3	Traditional (PMBoK, RUP, PRINCE2, etc)	From 2 to 5 years	More than 100 employees	Integration;Time;Human Resources	Time;Costs;Human Resources	Resource allocation;Possibility of delay;Possibility of exceeds costs	Yes
18	2018/08/18 11:11:27 AM GMT-3	Traditional (PMBoK, RUP, PRINCE2, etc)	More than 5 years	More than 100 employees	Scope;Quality;Human Resources;Communications	Communications	Risks to the project;Resource allocation	Yes
19	2018/08/18 11:41:44 AM GMT-3	The team does not use any specific methodology	Less than 2 years	More than 100 employees	Time;Costs;Stakeholders	Time;Stakeholders	Risks to the project;Resource allocation	Yes
20	2018/08/19 11:02:24 PM GMT-3	Bimodal (hybrid model with characteristics of agile and traditional projects)	More than 5 years	More than 100 employees	Scope;Quality;Risks;Stakeholders	Scope;Communications;Stakeholders	Risks to the project;Suggestions of requirements and new functionalities	Partially
21	2018/08/20 8:52:32 AM GMT-3	Bimodal (hybrid model with characteristics of agile and traditional projects)	More than 5 years	More than 100 employees	Scope;Quality;Risks	Scope;Quality;Risks	Risks to the project;Suggestions of requirements and new functionalities	Yes
22	2018/08/20 4:22:25 PM GMT-3	Traditional (PMBoK, RUP, PRINCE2, etc)	More than 5 years	More than 100 employees	Time;Costs;Human Resources	Human Resources	Resource allocation	Yes
23	2018/08/20 4:36:01 PM GMT-3	Bimodal (hybrid model with characteristics of agile and traditional projects)	From 2 to 5 years	Less than 20 employees	Scope;Time;Human Resources;Stakeholders	Scope;Human Resources;Communications	Risks to the project;Possibility of delay;Suggestions of requirements and new functionalities	Yes
24	2018/08/20 5:46:57 PM GMT-3	Agile	More than 5 years	Less than 20 employees	Scope;Time	Scope;Risks	Risks to the project;Possibility of delay;Possibility of exceeds costs	Yes
25	2018/08/20 6:30:34 PM GMT-3	Traditional (PMBoK, RUP, PRINCE2, etc)	From 2 to 5 years	From 20 to 100 employees	Integration;Time;Costs;Quality;Human Resources	Time;Quality;Human Resources	Risks to the project;Resource allocation;Possibility of delay;Possibility of exceeds costs	Yes
26	2018/08/20 7:46:06 PM GMT-3	Traditional (PMBoK, RUP, PRINCE2, etc)	More than 5 years	More than 100 employees	Integration;Time;Risks	Scope;Time;Quality	Risks to the project;Possibility of delay;Possibility of exceeds costs	Yes
27	2018/08/20 9:31:30 PM GMT-3	Agile	From 2 to 5 years	More than 100 employees	Integration;Time;Costs;Acquisitions;Stakeholders	Time;Costs;Stakeholders	Risks to the project;Possibility of exceeds costs	Partially
28	2018/08/21 8:44:31 AM GMT-3	Traditional (PMBoK, RUP, PRINCE2, etc)	More than 5 years	More than 100 employees	Integration;Communications	Integration;Human Resources;Communications	Risks to the project;Resource allocation;Possibility of delay;Possibility of exceeds costs;Suggestions of requirements and new functionalities	Yes
29	2018/08/21 9:22:17 AM GMT-3	Traditional (PMBoK, RUP, PRINCE2, etc)	More than 5 years	More than 100 employees	Integration;Scope;Time;Human Resources;Risks	Integration;Time;Human Resources	Risks to the project;Resource allocation;Possibility of delay;Possibility of exceeds costs;Suggestions of requirements and new functionalities	Yes
30	2018/08/21 11:44:25 AM GMT-3	Bimodal (hybrid model with characteristics of agile and traditional projects)	From 2 to 5 years	From 20 to 100 employees	Scope;Time;Costs;Risks	Scope;Time;Risks	Risks to the project;Possibility of delay;Possibility of exceeds costs	Yes
31	2018/08/21 11:55:27 AM GMT-3	Bimodal (hybrid model with characteristics of agile and traditional projects)	More than 5 years	From 20 to 100 employees	Scope;Quality;Communications;Risks	Scope;Quality	Risks to the project	Yes
32	2018/08/21 12:38:52 PM GMT-3	Agile	More than 5 years	From 20 to 100 employees	Integration;Scope	Quality;Communications	Resource allocation;Suggestions of requirements and new functionalities	Yes
33	2018/08/21 2:27:19 PM GMT-3	Agile	More than 5 years	More than 100 employees	Scope;Time;Costs;Communications;Risks	Scope;Time	Risks to the project;Resource allocation;Possibility of delay;Possibility of exceeds costs	Yes
34	2018/08/21 2:30:57 PM GMT-3	Traditional (PMBoK, RUP, PRINCE2, etc)	More than 5 years	More than 100 employees	Integration;Costs;Human Resources	Time;Costs;Human Resources	Possibility of delay	Yes
35	2018/08/21 2:47:01 PM GMT-3	The team does not use any specific methodology	From 2 to 5 years	More than 100 employees	Integration;Scope;Time;Quality;Stakeholders	Scope;Time;Stakeholders	Risks to the project;Possibility of delay	Yes
36	2018/08/21 3:08:42 PM GMT-3	Bimodal (hybrid model with characteristics of agile and traditional projects)	More than 5 years	More than 100 employees	Time;Costs;Communications;Acquisitions	Communications;Acquisitions	Resource allocation;Possibility of delay;Possibility of exceeds costs	Partially
37	2018/08/21 3:27:03 PM GMT-3	Traditional (PMBoK, RUP, PRINCE2, etc)	More than 5 years	More than 100 employees	Scope;Time;Costs;Human Resources	Time;Human Resources	Resource allocation;Possibility of delay	Yes
38	2018/08/21 6:04:04 PM GMT-3	Bimodal (hybrid model with characteristics of agile and traditional projects)	More than 5 years	More than 100 employees	Scope	Scope;Communications;Stakeholders	Risks to the project;Possibility of delay	Yes
39	2018/08/21 6:46:23 PM GMT-3	Agile	More than 5 years	More than 100 employees	Integration;Communications;Stakeholders	Time;Quality	Risks to the project;Resource allocation;Possibility of delay;Possibility of exceeds costs;Suggestions of requirements and new functionalities	Yes
40	2018/08/21 7:47:33 PM GMT-3	The team does not use any specific methodology	Less than 2 years	Less than 20 employees	Integration;Time;Quality;Communications	Time;Quality;Communications	Risks to the project;Possibility of delay;Possibility of exceeds costs	Yes
41	2018/08/21 8:39:28 PM GMT-3	The team does not use any specific methodology	From 2 to 5 years	More than 100 employees	Scope;Time;Costs;Communications;Risks	Scope;Time;Risks	Risks to the project;Resource allocation;Possibility of delay	Yes
42	2018/08/21 10:31:08 PM GMT-3	Traditional (PMBoK, RUP, PRINCE2, etc)	More than 5 years	More than 100 employees	Time;Quality;Risks	Time;Human Resources	Risks to the project;Possibility of delay;Possibility of exceeds costs	Yes
43	2018/08/21 10:56:47 PM GMT-3	Bimodal (hybrid model with characteristics of agile and traditional projects)	More than 5 years	More than 100 employees	Scope;Time;Quality;Communications;Risks	Integration;Quality	Risks to the project;Possibility of delay;Suggestions of requirements and new functionalities	Partially
44	2018/08/22 1:42:09 PM GMT-3	Bimodal (hybrid model with characteristics of agile and traditional projects)	More than 5 years	From 20 to 100 employees	Communications;Risks;Stakeholders	Scope;Communications;Stakeholders	Possibility of delay	Yes
45	2018/08/22 2:28:36 PM GMT-3	Bimodal (hybrid model with characteristics of agile and traditional projects)	More than 5 years	More than 100 employees	Scope;Quality;Communications;Stakeholders	Scope;Time;Risks	Risks to the project;Resource allocation;Possibility of delay	Partially
46	2018/08/23 11:02:55 AM GMT-3	Bimodal (hybrid model with characteristics of agile and traditional projects)	More than 5 years	More than 100 employees	Integration;Scope;Human Resources	Human Resources	Suggestions of requirements and new functionalities	Yes
47	2018/08/23 8:21:45 PM GMT-3	Bimodal (hybrid model with characteristics of agile and traditional projects)	More than 5 years	More than 100 employees	Time;Human Resources;Risks;Stakeholders	Integration;Risks;Stakeholders	Risks to the project;Resource allocation;Suggestions of requirements and new functionalities	Yes
48	2018/08/24 2:24:10 PM GMT-3	Traditional (PMBoK, RUP, PRINCE2, etc)	From 2 to 5 years	More than 100 employees	Time;Human Resources	Integration;Time	Risks to the project;Possibility of delay;Suggestions of requirements and new functionalities	Yes
49	2018/08/24 7:18:37 PM GMT-3	Bimodal (hybrid model with characteristics of agile and traditional projects)	More than 5 years	More than 100 employees	Integration;Scope	Scope;Risks	Risks to the project;Possibility of delay	Yes
50	2018/08/24 9:01:07 PM GMT-3	The team does not use any specific methodology	From 2 to 5 years	More than 100 employees	Integration;Scope;Costs;Communications	Integration;Communications;Risks	Risks to the project;Resource allocation;Possibility of delay;Possibility of exceeds costs	Partially
51	2018/08/26 9:37:34 PM GMT-3	Traditional (PMBoK, RUP, PRINCE2, etc)	From 2 to 5 years	More than 100 employees	Scope	Scope;Time;Costs	Suggestions of requirements and new functionalities	Yes
52	2018/09/03 5:53:04 PM GMT-3	Bimodal (hybrid model with characteristics of agile and traditional projects)	From 2 to 5 years	Less than 20 employees	Costs	Costs;Quality	Resource allocation;Possibility of delay	Yes
53	2018/09/05 3:04:54 PM GMT-3	Agile	More than 5 years	More than 100 employees	Integration;Scope;Human Resources;Risks	Scope	Risks to the project;Resource allocation;Possibility of delay;Possibility of exceeds costs	Yes
54	2018/09/13 8:31:20 PM GMT-3	Bimodal (hybrid model with characteristics of agile and traditional projects)	More than 5 years	More than 100 employees	Integration;Scope;Human Resources	Scope;Human Resources;Communications	Risks to the project;Suggestions of requirements and new functionalities	Yes
55	2018/10/15 6:06:30 PM GMT-3	Agile	More than 5 years	More than 100 employees	Scope;Human Resources;Communications	Scope;Human Resources	Risks to the project	Yes

## Sheet: Approach
Which approach does your team use currently?
Approach	Respondents	Proportion
Bimodal (hybrid model with characteristics of agile and traditional projects)	20	0.357143
Traditional (PMBoK, RUP, PRINCE2, etc)	15	0.267857
Agile	13	0.232143
The team does not use any specific methodology	8	0.142857
Total	56	1

## Sheet: Experience
What is your experience as a Project Manager or a member of a project team?
Experience	Respondents	Proportion
More than 5 years	40	0.714286
From 2 to 5 years	11	0.196429
Less than 2 years	5	0.0892857
Total	56	1

## Sheet: Employees
How many employees work in the company where you work currently?
Employees	Respondents	Proportion
More than 100 employees	41	0.732143
From 20 to 100 employees	8	0.142857
Less than 20 employees	7	0.125
Total	56	1

## Sheet: Areas - Critical
Which areas do you consider most critical to the success of the project?
Area	Respondents	Proportion
Time	25	0.446429
Costs	15	0.267857
Human Resources	19	0.339286
Scope	28	0.5
Quality	15	0.267857
Risks	16	0.285714
Communications	24	0.428571
Integration	22	0.392857
Stakeholders	15	0.267857
Acquisitions	2	0.0357143

## Sheet: Areas - Problems
In the projects where problems occurred, what were the areas in which the problems were identified?
Areas	Respondents	Proportion
Costs	8	0.142857
Time	25	0.446429
Quality	13	0.232143
Scope	22	0.392857
Communications	21	0.375
Stakeholders	11	0.196429
Integration	10	0.178571
Human Resources	14	0.25
Risks	10	0.178571
Acquisitions	1	0.0178571

## Sheet: Suggestions
What types of suggestions would you like to receive from a proactive project management tool?
Suggestion	Respondents	Proportion
Risks to the project	43	0.767857
Possibility of delay	40	0.714286
Possibility of exceeds costs	24	0.428571
Resource allocation	28	0.5
Suggestions of requirements and new functionalities	18	0.321429
Priority tasks	1	0.0178571

## Sheet: Past Information
Do you believe that information from other projects already completed could assist in project management?
Answer	Respondents	Proportion
Yes	48	0.857143
Partially	8	0.142857
Total	56	1
